# Supplementary material for: Association between Muscle Fatigability, Self-Perceived Fatigue and C-Reactive Protein at Admission in Hospitalized Geriatric Patients
Source: MDPI journal article supplement (doi:10.3390/ijerph20166582), 2023-08-16
Supplement: s1 [file s1]

## Supplementary Materials

**Table S1. Baseline characteristics compared between participants with missing data and participants with complete data for confounding variables.**

|                                               | Complete data<br>(n=86) | Missing data*<br>(n=18) | p-value** |
|-----------------------------------------------|-------------------------|-------------------------|-----------|
| Age (yrs, mean $\pm$ SD)                      | 83.1 $\pm$ 7.5          | 84.3 $\pm$ 7.3          | 0.57      |
| Weight (kg, mean $\pm$ SD)                    | 72.5 $\pm$ 16.1         | 69.2 $\pm$ 15.4         | 0.43      |
| CSF (mean $\pm$ SD)                           | 5.5 $\pm$ 1.4           | 5.6 $\pm$ 1.2           | 0.72      |
| BRS (mean $\pm$ SD)                           | 3.1 $\pm$ 0.8           | n.a.                    |           |
| Grip Strength (kPa, mean $\pm$ SD)            | 40.5 $\pm$ 16.9         | 39.7 $\pm$ 20.3         | 0.86      |
| Mortality during admission (% deceased)       | 23.9                    | 44.4                    | 0.14      |
| No chronic conditions (median [IQR])          | 4.0 [2.0–5.0]           | 3.0 [1.3–4.0]           | 0.08      |
| Length of stay (days, median [IQR])           | 7.0 [4.0–11.0]          | 4.5 [4.0–7.8]           | 0.10      |
| Fatigue resistance (s, median [IQR])          | 24.0 [16.0–40.0]        | 29.5 [21.5–36.8]        | 0.34      |
| Grip Work (median [IQR])                      | 667.5 [334.7–1170.0]    | 682.5 [501.0–1510.0]    | 0.55      |
| SPF (median [IQR])                            | 6.0 [5.0–8.0]           | 5.0 [2.3–7.5]           | 0.07      |
| CPV (median [IQR])                            | 1.6 [0.8–3.4]           | 3.4 [1.1–7.7]           | 0.07      |
| CRP (mg/L, median [IQR])                      | 19 [4.0–54.0]           | 59 [14.8–104.8]         | 0.04      |
| Time between PCV and CRP (days, median [IQR]) | 1.5 [1.0–2.0]           | 1.0 [0.0–1.0]           | <0.001    |

BRS, brief resilience scale; CFS, clinical frailty scale; CPV, capacity to perceived vitality ratio; CRP, C-reactive protein; IQR, interquartile range; SD, standard deviation.

\* The only confounder with missing data was the brief resilience scale (BRS).

\*\* Differences were examined using the t-test for normally distributed continuous variables, the sum rank test for not-normally distributed continuous variables and the chi-squared test for categorical variables.
